# Supplementary material for: mRNA Vaccines Against SARS‐CoV‐2 Variants Delivered by Lipid Nanoparticles Based on Novel Ionizable Lipids
Source: PubMed Central journal article supplement (PMC9349794; doi:10.1002/adfm.202204692), 2022-07-19
Supplement: ADFM-32-0-s001.pdf [file ADFM-32-0-s001.pdf]

## Supporting Information

for *Adv. Funct. Mater.*, DOI: 10.1002/adfm.202204692

mRNA Vaccines Against SARS-CoV-2 Variants  
Delivered by Lipid Nanoparticles Based on Novel  
Ionizable Lipids

*Kepan Chen, Na Fan, Hai Huang, Xin Jiang, Shugang  
Qin, Wen Xiao, Qian Zheng, Yupei Zhang, Xing Duan,  
Zeyi Qin, Yongmei Liu, Jun Zeng, Yuquan Wei, and  
Xiangrong Song\**

# mRNA Vaccines against SARS-CoV-2 Variants Delivered by Lipid Nanoparticles Based on Novel Ionizable Lipids

Kepan Chen <sup>#,1</sup>, Na Fan <sup>#,1</sup>, Hai Huang <sup>#,1</sup>, Xin Jiang <sup>#,1</sup>, Shugang Qin <sup>1</sup>, Wen Xiao <sup>1</sup>, Qian Zheng <sup>1</sup>, Yupei Zhang <sup>1</sup>, Xing Duan <sup>1</sup>, Zeyi Qin <sup>2</sup>, Yongmei Liu <sup>1</sup>, Jun Zeng <sup>1</sup>, Yuquan Wei <sup>1</sup>, Xiangrong Song\* <sup>1</sup>

<sup>1</sup>Department of Critical Care Medicine, Frontiers Science Center for Disease-related Molecular Network, State Key Laboratory of Biotherapy, West China Hospital, Sichuan University, Chengdu 610041, China

<sup>2</sup>Department of Biology, Brandeis University, Boston 02453, USA

E-mail: songxr@scu.edu.cn

## Supporting figures

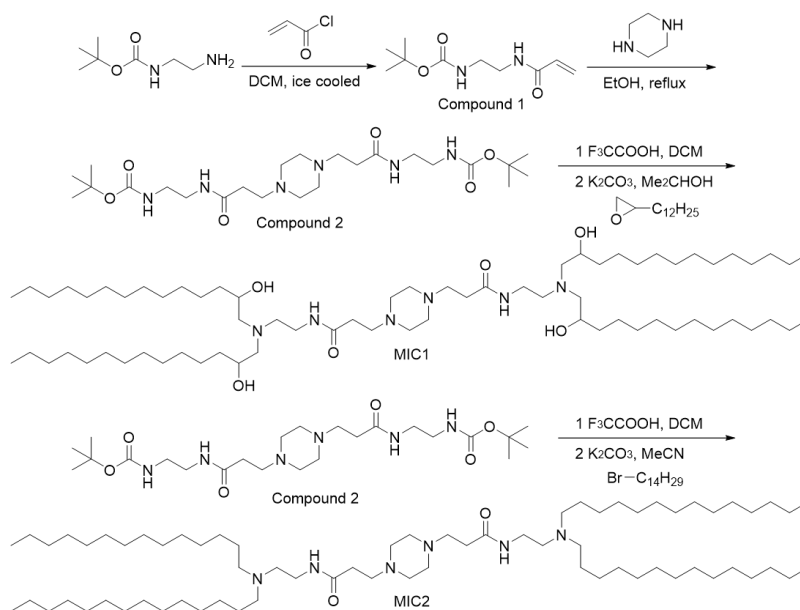

**Figure S1.** Synthesis routes of MIC1 and MIC2.

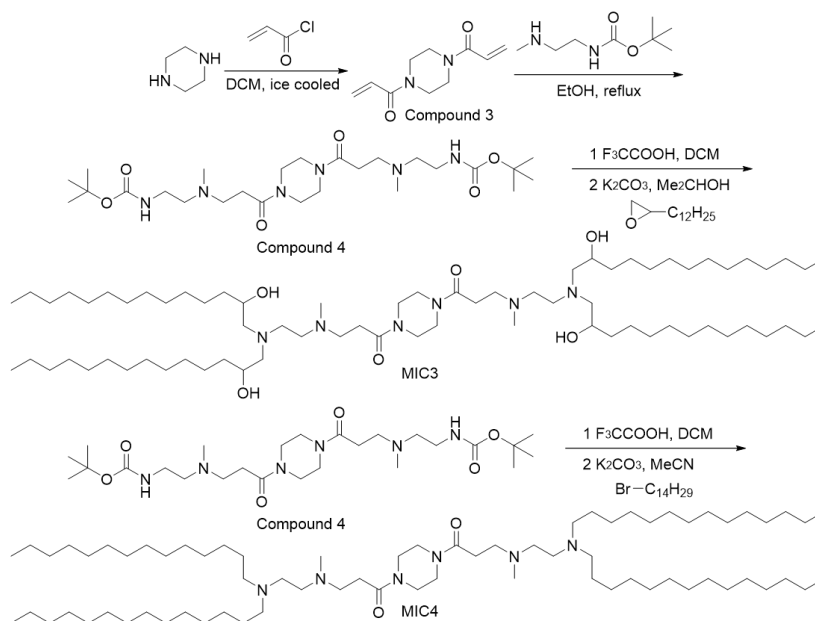

**Figure S2.** Synthesis routes of MIC3 and MIC4.

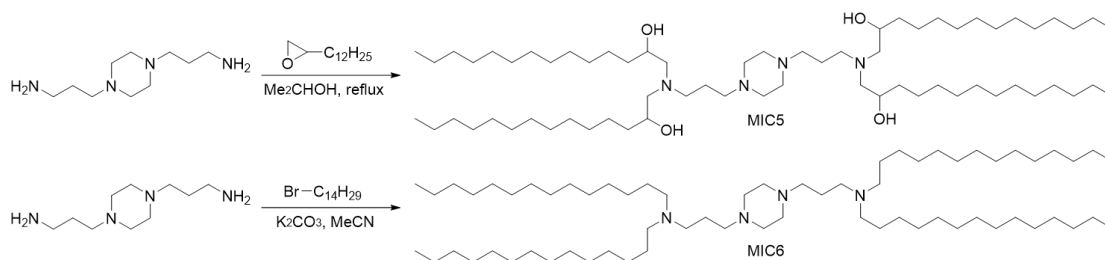

**Figure S3.** Synthesis routes of MIC5 and MIC6.

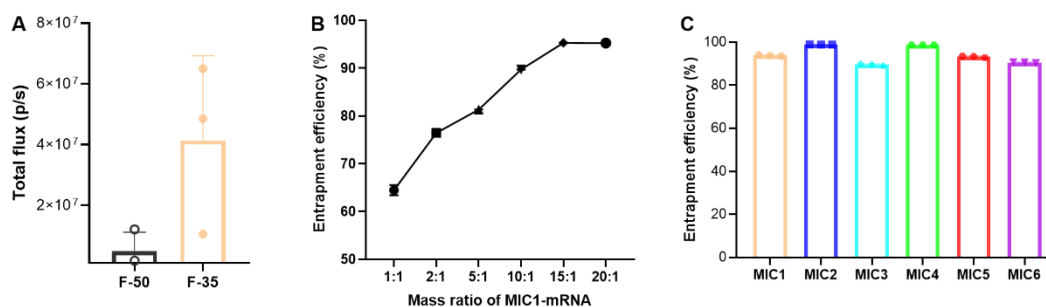

**Figure S4.** Formulation screening and optimization of 4N4T-LNPs.

A) MIC1-LNPs@FLuc mRNA were prepared using the two formulas reported in literatures, namely 50:10:38.5:1.5<sup>[1]</sup> (F-50) for MC3 and 35:16:46.5:2.5<sup>[2]</sup> (F-35) for C12-200 and OF-2<sup>[3]</sup>. The relative luciferase expression via intramuscular injection (10  $\mu\text{g}$  of mRNA per mouse) was shown in the figure above. Since the fluorescence intensity of the F-35 formula was much higher than that of the F-50 formula, we selected F-35 formula for further research. B) Entrapment efficiency at different mass ratios of mRNA to MIC1 was investigated and 15:1 was the optimized mass ratio. C) Entrapment efficiency of different 4N4T-LNPs prepared using F-35 and mass ratio of 15:1 was examined. The results showed that different LNPs had good entrapment efficiency of mRNA. In summary, we believe that this formula can be universal for the construction of 4N4T-LNPs.

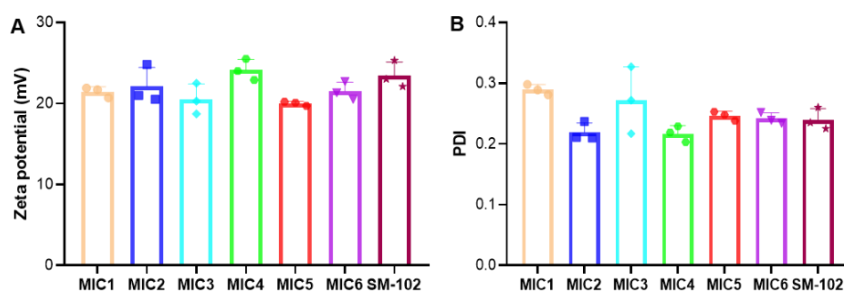

**Figure S5.** Average  $\zeta$  potential (A) and PDI (B) of 4N4T-LNPs.

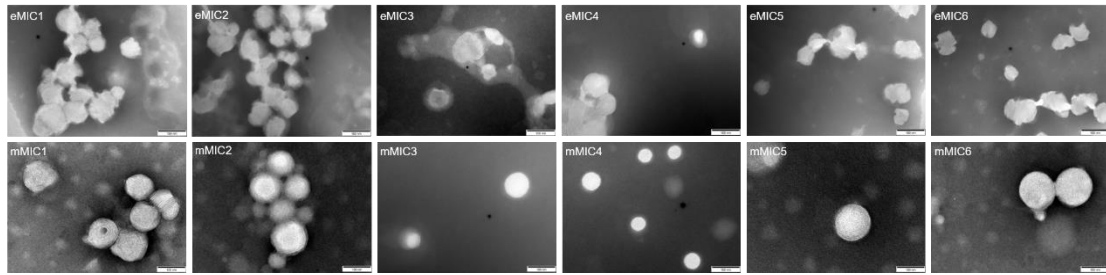

**Figure S6.** Representative TEM images of 4N4T-LNPs with no mRNA loaded (eMICx) and 4N4T-LNPs loaded with mRNA (mMICx). LNPs of eMICx appeared looser, while LNPs of mMICx were more compact. This should be caused by the compression of ionizable lipids by long-chain mRNA molecules. Scale bar = 100 nm.

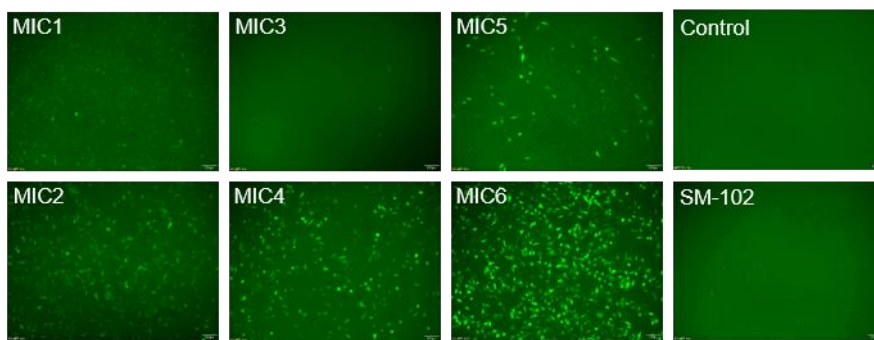

**Figure S7.** Representative fluorescence microscopic images of DC2.4 cells after 24 h of incubation with 4N4T-GFP mRNA. Scale bar = 100  $\mu$ m.

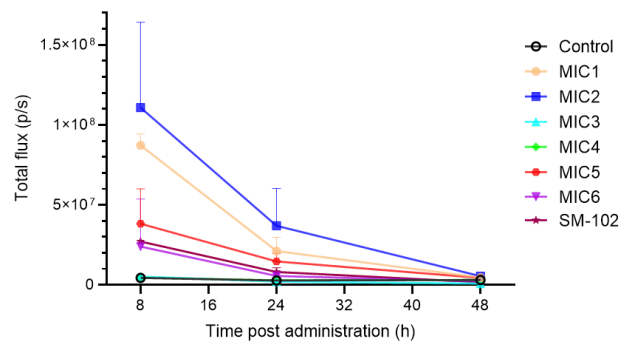

**Figure S8.** Luciferase activity over time after administration of 10  $\mu$ g of FLuc mRNA.

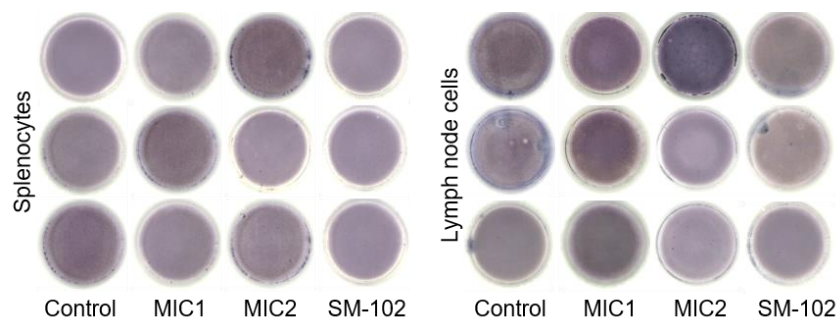

**Figure S9.** The quantification of IL-4-secreting T cells in splenocytes and lymph node cells.

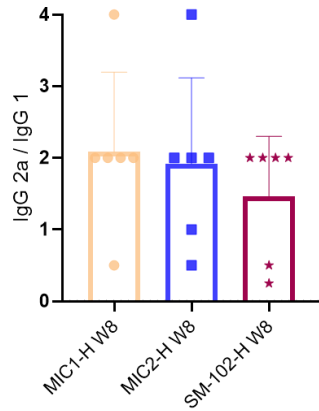

**Figure S10.** IgG2a/IgG1 ratio of serum in high-dose groups at week 8.

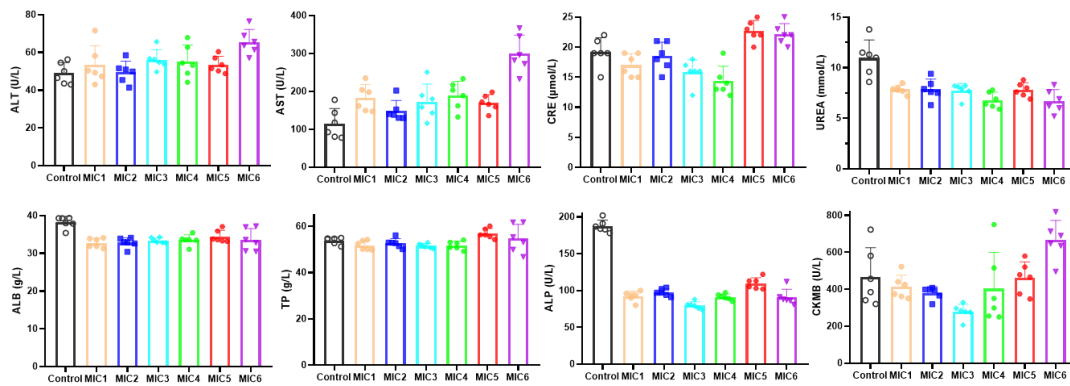

**Figure S11.** Blood biochemistry of mice 24 h after intramuscular administration with 30 µg 4N4T-DS mRNA.

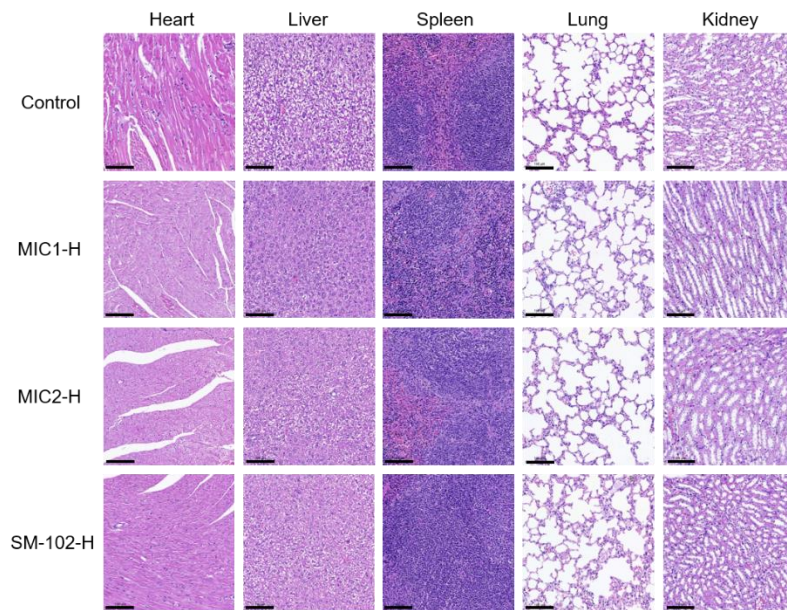

**Figure S12.** Representative histopathology (H&E) of major organs harvested 8 weeks after vaccination. Scale bar = 100 µm.

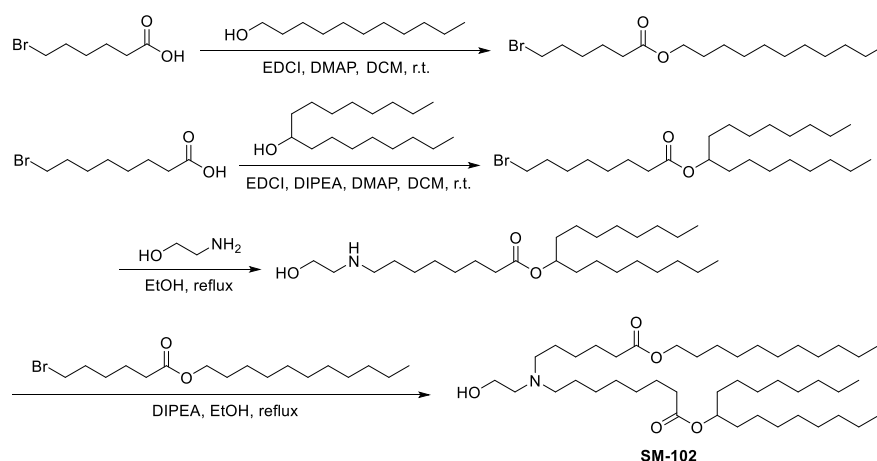

**Figure S13.** Chemical structure and synthetic route of SM-102.

**Table S1.** Characterization of 4N4T lipids

| Abbreviation | <sup>1</sup> H NMR (400 MHz, CDCl <sub>3</sub> , δ)                                                                                                                         |
|--------------|-----------------------------------------------------------------------------------------------------------------------------------------------------------------------------|
| Compound 1   | δ (ppm) = 6.45 (s, 1H), 6.26 (d, J=17.0, 1H), 6.10 (dd, J=17.0, 10.3, 1H), 5.64 (d, J=10.3, 1H), 4.96 (s, 1H), 3.44 (dd, J=11.1, 5.4, 2H), 3.38–3.21 (m, 2H), 1.44 (s, 9H). |
| Compound 2   | δ (ppm) = 8.13 (s, 2H), 4.96 (s, 2H), 3.35 (dd, J=11.6, 5.7, 4H), 3.19 (dd, J=42.8, 6.3, 4H), 2.83–2.45 (m, 12H), 2.39 (t, J=6.1, 4H), 1.40 (s, 18H).                       |
| MIC1         | δ (ppm) = 8.21–8.01 (m, 2H), 3.58 (s, 4H), 3.41–3.22 (m, 4H), 2.76–2.30 (m, 28H), 1.49–1.37 (m, 8H), 1.26 (s, 88H), 0.88 (t, J=6.8, 12H).                                   |
| MIC2         | δ (ppm) = 7.69 (t, J=4.7, 2H), 3.29 (dd, J=11.2, 5.7, 4H), 2.62 (t, J=6.4, 4H), 2.57–2.28 (m, 24H), 1.40 (m, 8H), 1.35–1.17 (s, 88H), 0.88 (t, J=6.8, 12H).                 |
| Compound 3   | δ (ppm) = 6.64–6.51 (m, J=16.7, 5.6, 4.6, 2H), 6.33 (dd, J=16.8, 1.7, 2H), 5.76 (dd, J=10.5, 1.7, 2H), 3.70 (d, J=34.4, 8H).                                                |
| Compound 4   | δ (ppm) = 5.20 (s, 2H), 3.58 (dd, J=53.6, 16.8, 8H), 3.22 (d, J=5.0, 4H), 2.79–2.68 (m, 4H), 2.50 (dd, J=12.4, 6.1, 8H), 2.25 (s, 6H), 1.44 (s, 18H).                       |
| MIC3         | δ (ppm) = 5.19 (s, 2H), 3.75–3.42 (m, 8H), 3.23 (d, J=5.0, 4H), 2.88–2.16 (m, 30H), 1.47–1.16 (m, 92H), 0.89 (t, J=6.8, 12H).                                               |
| MIC4         | δ (ppm) = 3.57 (dd, J=48.8, 18.3, 8H), 2.86–2.21 (m, 30H), 1.55–1.18 (m, 96H), 0.89 (t, J=6.8, 12H).                                                                        |
| MIC5         | δ (ppm) = 4.61–3.77 (m, 4H), 3.73–3.49 (m, 4H), 2.91–2.14 (m, 24H), 1.68–1.53 (m, 4H), 1.50–1.38 (m, 8H), 1.34–1.23 (s, 88H), 0.88 (t, J=6.8, 12H).                         |
| MIC6         | δ (ppm) = 2.79–2.30 (m, 24H), 1.76–1.65 (m, 4H), 1.54–1.43 (m, 8H), 1.34–1.18 (s, 88H), 0.88 (t, J=6.1, 12H).                                                               |

References:

- [1] Miao, L.; Lin, J.; Huang, Y.; Li, L.; Delcassian, D.; Ge, Y.; Shi, Y.; Anderson, D. G., Synergistic lipid compositions for albumin receptor mediated delivery of mRNA to the liver. *Nat Commun* 2020, 11 (1), 2424.
- [2] Kauffman, K. J.; Dorkin, J. R.; Yang, J. H.; Heartlein, M. W.; DeRosa, F.; Mir, F. F.; Fenton, O. S.; Anderson, D. G., Optimization of Lipid Nanoparticle Formulations for mRNA Delivery in Vivo with Fractional Factorial and Definitive Screening Designs. *Nano Lett* 2015, 15 (11), 7300-6.
- [3] Fenton, O. S.; Kauffman, K. J.; McClellan, R. L.; Appel, E. A.; Dorkin, J. R.; Tibbitt, M. W.; Heartlein, M. W.; DeRosa, F.; Langer, R.; Anderson, D. G., Bioinspired Alkenyl Amino Alcohol

Ionizable Lipid Materials for Highly Potent In Vivo mRNA Delivery. *Adv Mater* 2016, 28 (15), 2939-43.
